# Supplementary material for: A Novel Minidumbbell DNA-Based Sensor for Silver Ion Detection
Source: Biosensors (Basel). 2023 Mar 8;13(3):358. doi: 10.3390/bios13030358 (PMC10046540; doi:10.3390/bios13030358)
Supplement: Supplementary file 1 [file biosensors-13-00358-s001.zip › biosensors-2183870-supplementary.pdf]

Communication

# A Novel Minidumbbell DNA-Based Sensor for Silver Ion Detection

Jiacheng Zhang <sup>1,2,†</sup>, Yuan Liu <sup>3,†</sup>, Zhenzhen Yan <sup>1,2</sup>, Yue Wang <sup>4,\*</sup> and Pei Guo <sup>2,\*</sup>

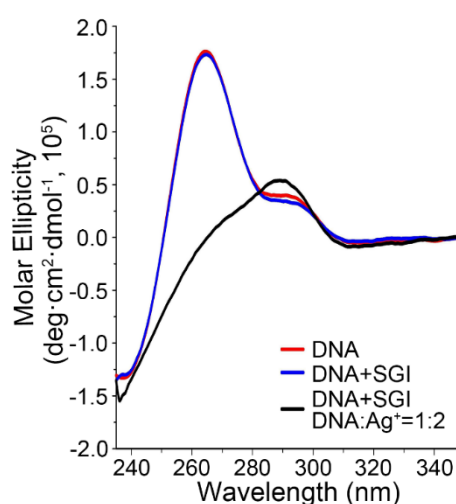

**Figure S1.** CD spectra of 15  $\mu\text{M}$  CCTG<sub>2</sub> and CAGG<sub>2</sub> with 50 nM SGI in 10 mM NaPi at pH 6 before and after adding 30  $\mu\text{M}$  Ag<sup>+</sup>.

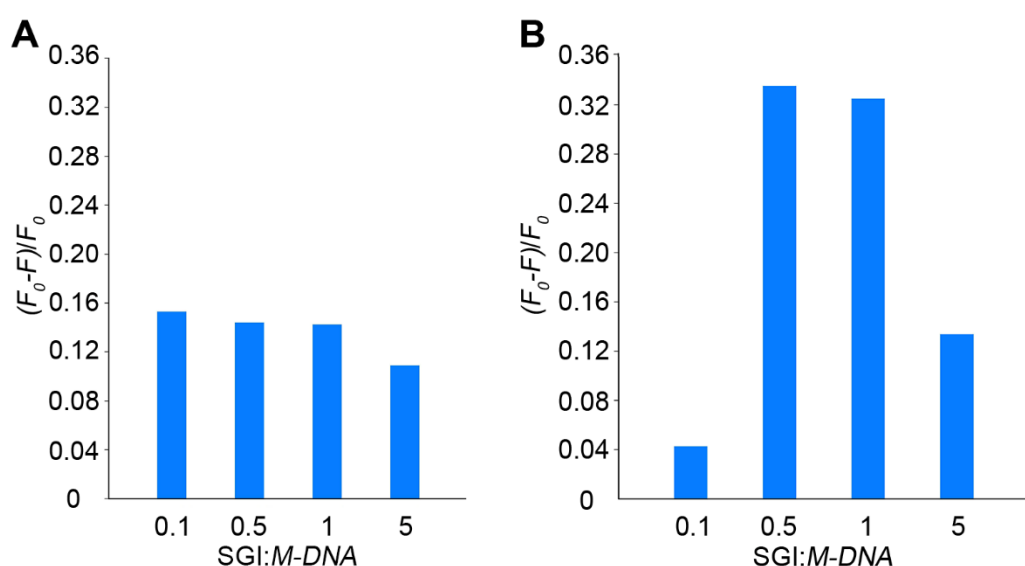

**Figure S2.** Fluorescence changes of (A) 200 nM M-DNA and (B) 50 nM M-DNA in 10 mM NaPi at pH 6 with different SGI:M-DNA ratios before and after adding Ag<sup>+</sup>.  $F_0$ : initial fluorescence intensity at 520 nm in the absence of Ag<sup>+</sup>,  $F$ : fluorescence intensity at 520 nm after adding 400 nM AgNO<sub>3</sub>.

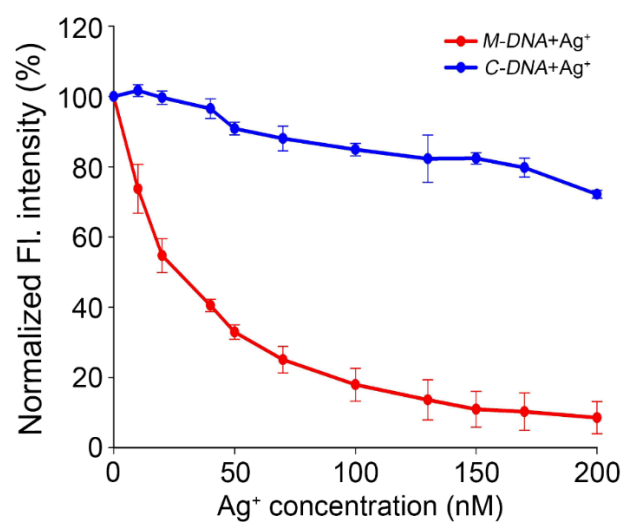

**Figure S3.** Normalized fluorescence intensity at 520 nm of the *M-DNA* (red) and *C-DNA* (blue) upon titrating various concentrations of  $\text{Ag}^+$ . Error bars were standard deviations obtained from three replicative experiments. Condition of sample for  $\text{Ag}^+$  titration: 50 nM DNA and 50 nM SGI in 10 mM NaPi at pH 6.
